# Supplementary material
Source: publisher site journal article supplement (https://oneecosystem.pensoft.net/article/download/suppl/7725280/)
Supplement: Supplementary file 1

**ANNEX B Values of damage functions per unit of area for each of the CLC classes used**

**LANDCOVER | DAMAGE**

| landcover:HighDensityUrban | 253.61. |
| --- |
| landcover:MediumDensityUrban | 227.35. |
| landcover:LowDensityUrban | 201.15. |
| landcover:IndustrialCommercialUnits | 154.93. |
| landcover:RoadRailNetwork | 8.6. |
| landcover:Port | 84.86. |
| landcover:Airport | 10.91. |
| landcover:MineralExtraction | 0.05. |
| landcover:Dump | 0.09. |
| landcover:Construction | 74.21. |
| landcover:GreenUrbanArea | 57.16. |
| landcover:SportLeisureFacility | 55.68. |
| landcover:NonIrrigatedArableLand | 0.47. |
| landcover:PermanentlyIrrigatedArableLand | 0.46. |
| landcover:RiceField | 0.48. |
| landcover:Vineyard | 0.44. |
| landcover:FruitAndBerryPlantation | 0.42. |
| landcover:OliveGrove | 0.45. |
| landcover:Pastureland | 0.44. |
| landcover:AnnualCroplandAssociatedWithPermanent | 0.36. |
| landcover:ComplexCultivationPatternedLand | 0.46. |
| landcover:AgriculturalLandWithNaturalVegetation | 0.27. |
| landcover:AgroForestryLand | 0.31. |
| landcover:ConiferousForest | 0. |
| landcover:BroadleafForest | 0. |
| landcover:MixedForest | 0. |
| landcover:Grassland | 0.29. |
| landcover:MoorAndHeathland | 0.13. |
| landcover:SclerophyllousVegetation | 0.16. |
| landcover:TransitionalWoodlandScrub | 0. |
| landcover:BeachDuneAndSand | 0. |
| landcover:SparseVegetation | 0.09. |
| landcover:BurnedLand | 0. |
| landcover:InlandMarsh | 0. |
| landcover:PeatBog | 0. |
| landcover:SaltMarsh | 0. |
